# Supplementary material for: Development and Validation of an HPLC Method for the Quantitative Analysis of Bromophenolic Compounds in the Red Alga Vertebrata lanosa
Source: PubMed Central journal article supplement (PMC6950000; doi:10.3390/md17120675), 2019-11-29
Supplement: marinedrugs-17-00675-s001.pdf [file marinedrugs-17-00675-s001.pdf]

# Supplementary material

## Development and validation of an HPLC method for the quantitative analysis of bromophenolic compounds in the red alga *Vertebrata lanosa*

Stefanie Hofer <sup>1</sup>, Anja Hartmann <sup>1\*</sup>, Maria Orfanoudaki <sup>1</sup>, Hieu Ngoc Nguyen <sup>1</sup>, Markus Nagl <sup>3</sup>, Ulf Karsten <sup>2</sup>, Svenja Heesch <sup>2</sup> and Markus Ganzera <sup>1</sup>

<sup>1</sup> Department of Pharmacognosy, University of Innsbruck, Innrain 80-82, Innsbruck, 6020, Austria; e-mails: [stefanie.hofer@uibk.ac.at](mailto:stefanie.hofer@uibk.ac.at) (S.H.); [anja.hartmann@uibk.ac.at](mailto:anja.hartmann@uibk.ac.at) (A.H.); [maria.orfanoudaki@uibk.ac.at](mailto:maria.orfanoudaki@uibk.ac.at) (M.O.); [hieunguyen@snu.ac.kr](mailto:hieunguyen@snu.ac.kr) (H.N.N.); [markus.ganzera@uibk.ac.at](mailto:markus.ganzera@uibk.ac.at) (M.G.)

<sup>2</sup> Institute of Biological Sciences, Applied Ecology & Phycology, University of Rostock, Albert-Einstein-Str. 3, Rostock, 18059, Germany; emails: [ulf.karsten@uni-rostock.de](mailto:ulf.karsten@uni-rostock.de) (U.K.); [svenja.heesch@uni-rostock.de](mailto:svenja.heesch@uni-rostock.de) (S.H.)

<sup>3</sup> Institute of Hygiene and Medical Microbiology, Medical University of Innsbruck, Schöpfstraße 41, Innsbruck, 6020, Austria; e-mail: [m.nagl@i-med.ac.at](mailto:m.nagl@i-med.ac.at) (M.N.)

\* Correspondence: [anja.hartmann@uibk.ac.at](mailto:anja.hartmann@uibk.ac.at)

Received: date; Accepted: date; Published: date

## Content:

Table S1. NMR shift values for Compounds 2-7.

Table S2. Screened algae

Figure S1. HPLC separation of 7 standards with different gradients.

Figure S2. HPLC-MS analysis of the methanolic *Vertebrata lanosa* extract.

Figure S3. HPLC analysis after sample enrichment on an SPE cartridge.

Figure S4. <sup>1</sup>H-NMR and <sup>13</sup>C-NMR spectra of the new compound.

Figure S5. HMBC, COSY and HSQC spectra of the new compound.

|    | Methylrhodomelol ( <b>2</b> ) |                | Lanosol ( <b>3</b> ) |                | Lanosol methyl ether ( <b>4</b> ) |                |
|----|-------------------------------|----------------|----------------------|----------------|-----------------------------------|----------------|
|    | <sup>13</sup> C               | <sup>1</sup> H | <sup>13</sup> C      | <sup>1</sup> H | <sup>13</sup> C                   | <sup>1</sup> H |
| 1' | 128.0                         | -              | 134.3                | -              | 131.0                             | -              |
| 2' | 117.9                         | -              | 114.1                | -              | 115.3                             | -              |
| 3' | 113.6                         | -              | 114.2                | -              | 114.3                             | -              |
| 4' | 144.9                         | -              | 144.8                | -              | 145.3                             | -              |
| 5' | 145.8                         | -              | 146.4                | -              | 146.3                             | -              |
| 6' | 118.7                         | 6.93 (s)       | 114.9                | 7.01 (s)       | 115.8                             | 6.92 (s)       |
| 7' | 39.0                          | 3.33 (d)       | 65.7                 | 4.55 (d)       | 75.9                              | 4.43 (s)       |
| 1  | -                             | -              | -                    | -              | 58.5                              | 3.40 (s)       |
| 2  | 173.2                         | -              | -                    | -              | -                                 | -              |
| 3  | 84.0                          | -              | -                    | -              | -                                 | -              |
| 3a | 110.5                         | -              | -                    | -              | -                                 | -              |
| 4  | -                             | -              | -                    | -              | -                                 | -              |
| 5  | 76.9                          | 4.25/4.12 (m)  | -                    | -              | -                                 | -              |
| 6  | 74.8                          | 4.40 (m)       | -                    | -              | -                                 | -              |
| 6a | 88.9                          | 4.61 (d)       | -                    | -              | -                                 | -              |
| 7  | 54.6                          | 3.58 (m)       | -                    | -              | -                                 | -              |

  

|     | 3-Bromo-4-(2,3-dibromo-4,5-dihydroxybenzyl)-5-methoxymethylpyrocatechol ( <b>5</b> ) |                | 5-((2,3-Dibromo-4,5-dihydroxybenzyloxy)methyl)-3,4-dibromobenzene-1,2-diol ( <b>6</b> ) |                | 2,2',3,3'-Tetrabromo-4,4',5,5'-tetrahydroxydiphenylmethane ( <b>7</b> ) |                |
|-----|--------------------------------------------------------------------------------------|----------------|-----------------------------------------------------------------------------------------|----------------|-------------------------------------------------------------------------|----------------|
|     | <sup>13</sup> C                                                                      | <sup>1</sup> H | <sup>13</sup> C                                                                         | <sup>1</sup> H | <sup>13</sup> C                                                         | <sup>1</sup> H |
| 1'  | 127.5                                                                                | -              | 129.1                                                                                   | -              | 133.1                                                                   | -              |
| 2'  | 113.1                                                                                | -              | 113.3                                                                                   | -              | 117.4                                                                   | -              |
| 3'  | 142.8                                                                                | -              | 113.2                                                                                   | -              | 115.0                                                                   | -              |
| 4'  | 144.4                                                                                | -              | 145.1                                                                                   | -              | 145.0                                                                   | -              |
| 5'  | 115.6                                                                                | 6.86 (s)       | 144.0                                                                                   | -              | 147.0                                                                   | -              |
| 6'  | 128.5                                                                                | -              | 114.9                                                                                   | 7.01 (s)       | 117.2                                                                   | 6.47 (s)       |
| 7'  | 72.1                                                                                 | 4.12 (s)       | 72.1                                                                                    | 4.51 (s)       | -                                                                       | -              |
| 1'' | 57.4                                                                                 | 3.18 (s)       | -                                                                                       | -              | -                                                                       | -              |
| 1   | 130.4                                                                                | -              | 129.1                                                                                   | -              | 133.1                                                                   | -              |
| 2   | 114.6                                                                                | -              | 113.3                                                                                   | -              | 117.4                                                                   | -              |
| 3   | 114.3                                                                                | -              | 113.2                                                                                   | -              | 115.0                                                                   | -              |
| 4   | 142.8                                                                                | -              | 145.1                                                                                   | -              | 145.0                                                                   | -              |
| 5   | 145.1                                                                                | -              | 144.0                                                                                   | -              | 147.0                                                                   | -              |
| 6   | 113.9                                                                                | 6.02 (s)       | 114.9                                                                                   | 7.01 (s)       | 117.2                                                                   | 6.47 (s)       |
| 7   | 38.3                                                                                 | 3.97 (s)       | 72.1                                                                                    | 4.51 (s)       | 45.9                                                                    | 4.03 (s)       |

**Table S1.** NMR shift values for Compounds **2-7** in MeOD (**2-4**) or DMSO (**5-7**); the spectra were recorded on a 600 MHz NMR instrument.

|    | Name of alga/lichen          |
|----|------------------------------|
| 1  | <i>Jania rubens</i>          |
| 2  | <i>Colpomenia peregrina</i>  |
| 3  | <i>Dictyota dichotoma</i>    |
| 4  | <i>Grateloupia turuturu</i>  |
| 5  | <i>Calliblepharis jubata</i> |
| 6  | <i>Lichina pygmaea</i>       |
| 7  | <i>Ceramium sp.</i>          |
| 8  | <i>Laminaria ochroleuca</i>  |
| 9  | <i>Ulva lactuca</i>          |
| 10 | <i>Cladophora sp.</i>        |
| 11 | <i>Pelvetia canaliculata</i> |
| 12 | <i>Ulva sp.</i>              |
| 13 | <i>Gracilaria gracilis</i>   |
| 14 | <i>Fucus spiralis</i>        |
| 15 | <i>Saccharina latissima</i>  |
| 16 | <i>Himanthalia elongata</i>  |
| 17 | <i>Osmundea sp.</i>          |
| 18 | <i>Mastocarpus stellatus</i> |
| 19 | <i>Ascophyllum nodosum</i>   |
| 20 | <i>Chondrus crispus</i>      |

**Table S2.** Algae and one lichen that were screened for the presence of the 7 bromophenols; all collected 2018, Roscoff, Brittany, 48.727559 °N; 3.987924 °W, collected and identified by U.Karsten and S.Heesch University of Rostock.

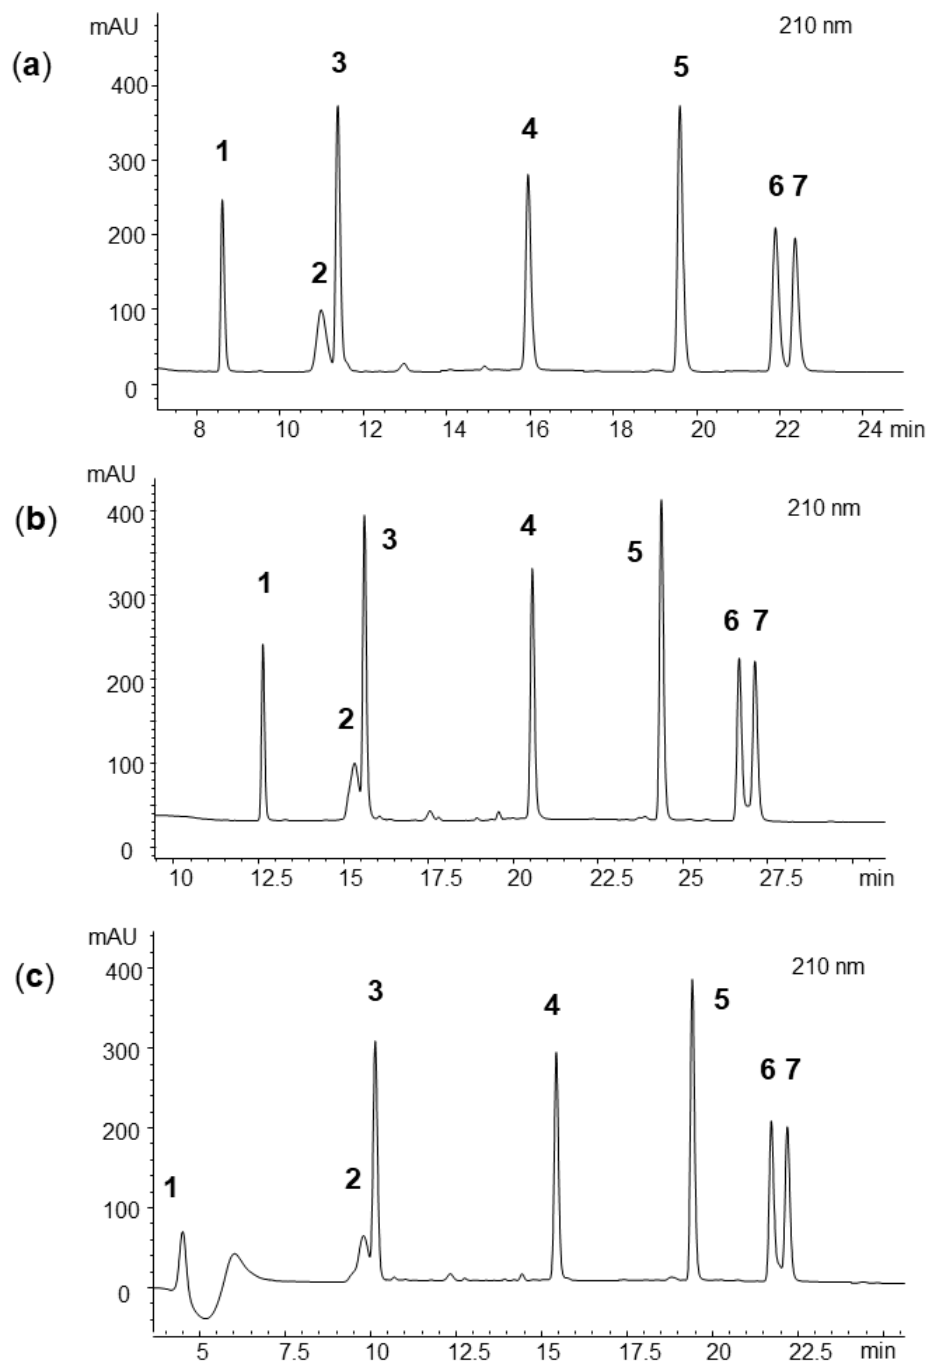

**Figure S1.** (a) HPLC separation of 7 standards under optimized conditions with a gradient of 2% B at 0 min, 20% B at 0.1 min, 50% B at 15 min, 70% B at 35 min (b) Poorer HPLC separation of the standards if 2% B was left for 5 min (c) Starting conditions of 20% B resulted negatively on the separation of peak 2 and 3.

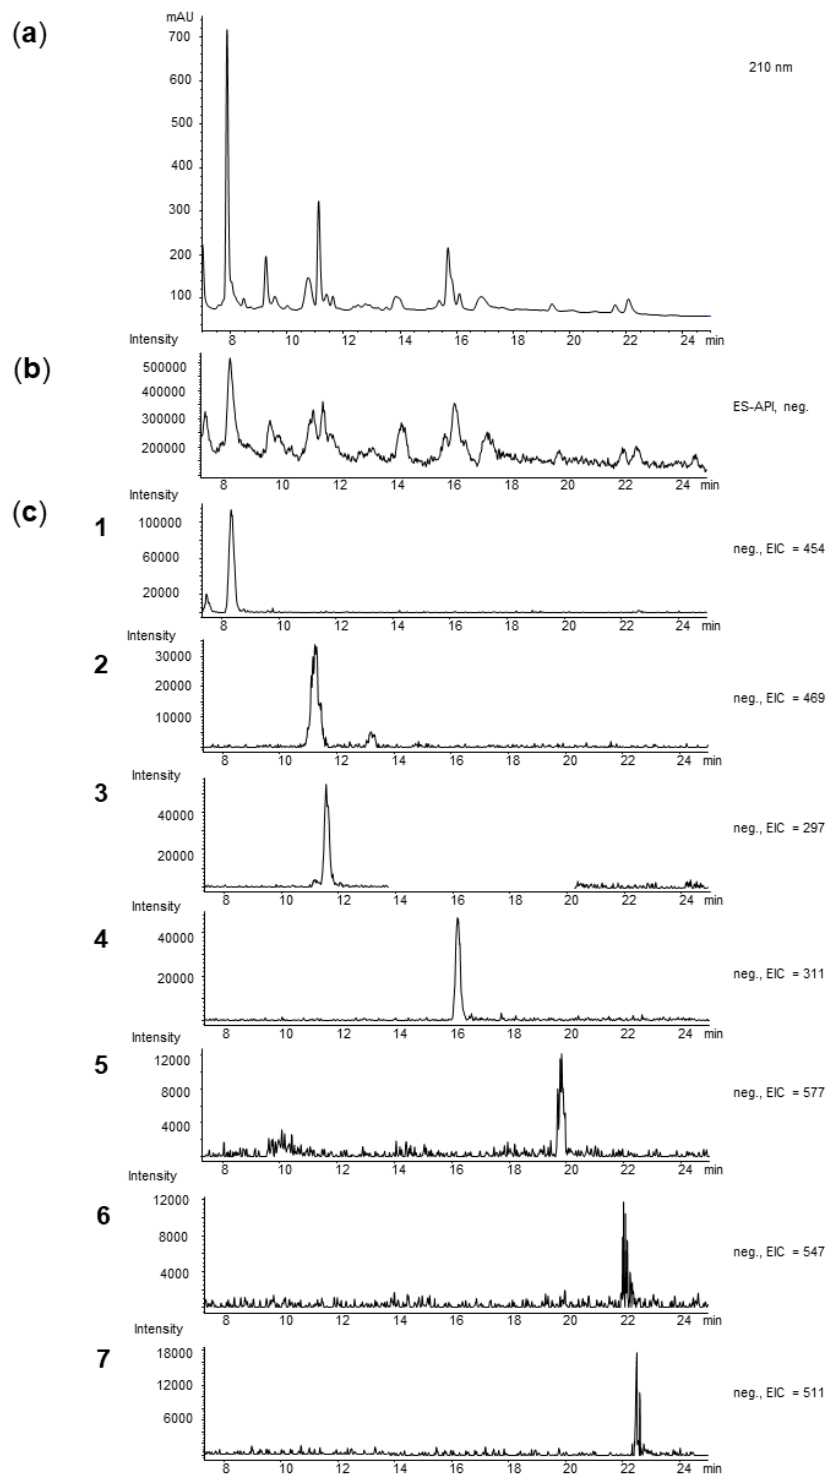

**Figure S2.** HPLC-MS analysis of the methanolic *Vertebrata lanosa* extract under optimized conditions with a gradient of 2% B at 0 min, 20% B at 0.1 min, 50% B at 15 min, 70% B at 35 min using water and acetonitrile each containing 0.1% formic acid as mobile phase; **(a)** detection: 210 nm **(b)** mass detection by applying ESI-API in negative mode **(c)** extracted ion chromatograms of the 7 isolated bromophenols.

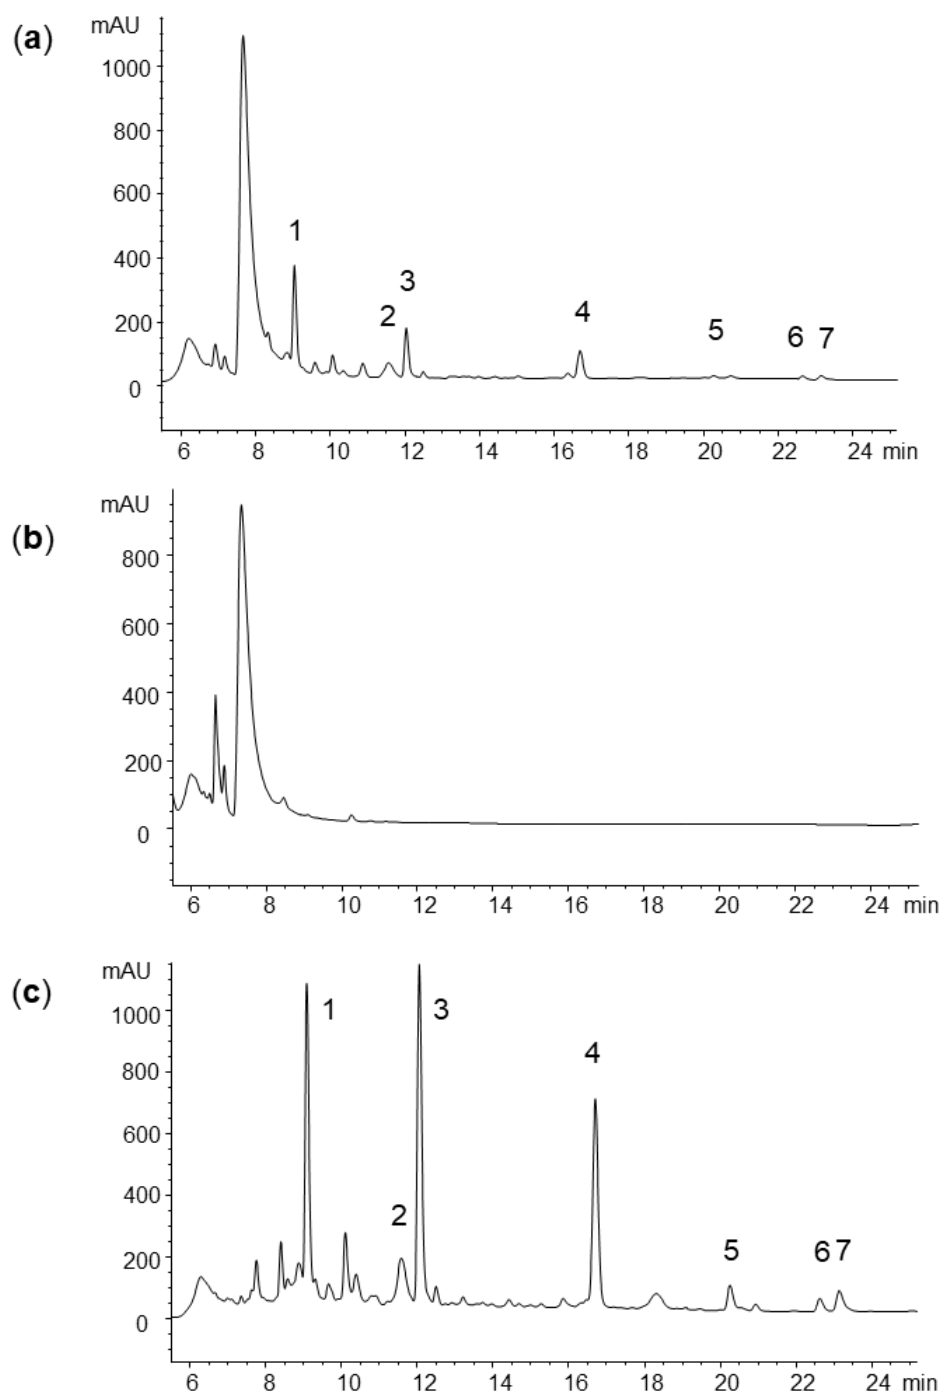

**Figure S3.** (a) Crude methanolic extract of *Vertebrata lanosa*; (b) chromatogram of the impurities that were selectively removed; (c) sample after enrichment on an SPE cartridge.

(a)

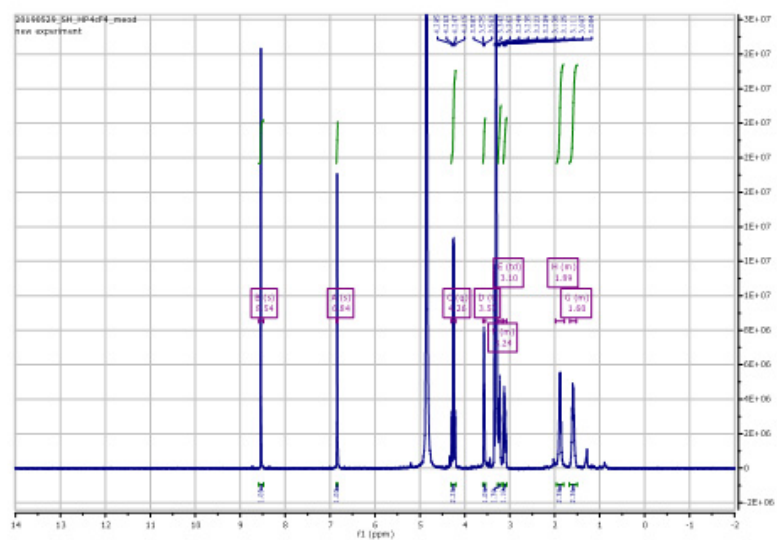

(b)

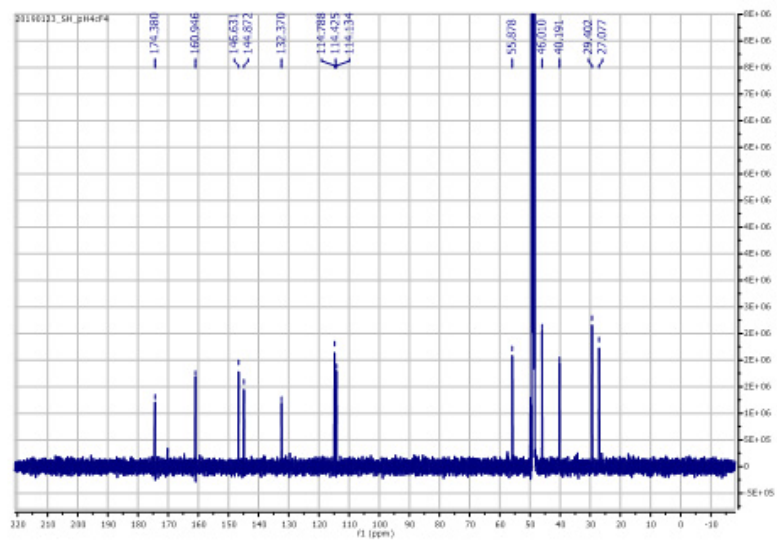

Figure S4. (a)  $^1\text{H}$ -NMR and (b)  $^{13}\text{C}$ -NMR spectra of the new compound, recorded in MeOD on a 600 MHz NMR instrument.



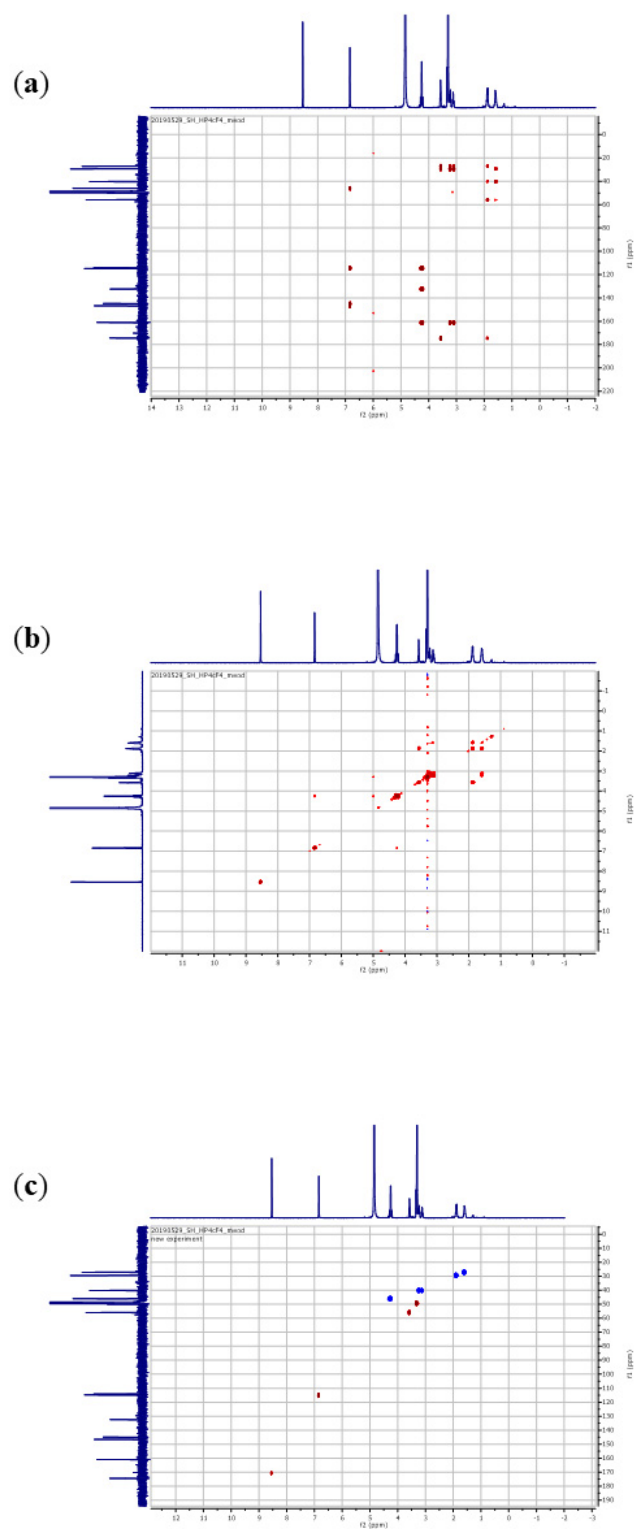

**Figure S5.** (a) HMBC (b) COSY and (c) HSQC spectra of the new compound, recorded in MeOD on a 600 MHz NMR instrument.
